1 Mutation load dynamics during environmentally-driven  
2 range shifts

3

4 Kimberly J. Gilbert<sup>1,2,\*</sup>, Stephan Peischl<sup>1,2,3</sup>, Laurent Excoffier<sup>1,2</sup>

5

6

7 1. Institute of Ecology and Evolution, University of Bern, 3012 Bern, Switzerland

8 2. Swiss Institute of Bioinformatics, 1015 Lausanne, Switzerland

9 3. Interfaculty Bioinformatics Unit, University of Bern, 3012 Bern, Switzerland

10 \* Corresponding author

11 E-mail: [kimberly.gilbert@iee.unibe.ch](mailto:kimberly.gilbert@iee.unibe.ch)

12

13

14 Short title: Mutation load dynamics during environmentally-driven range shifts

15

16 *Keywords: range expansion, range shift, expansion load, genetic drift*

17

## 18 Abstract

19           The fitness of spatially expanding species has been shown to decrease over time and  
20 space, but specialist species tracking their changing environment and shifting their range  
21 accordingly have been little studied. We use individual-based simulations and analytical  
22 modeling to compare the impact of range expansions and range shifts on genetic diversity and  
23 fitness loss, as well as the ability to recover fitness after either a shift or expansion. We find that  
24 the speed of a shift has a strong impact on fitness evolution. Fastest shifts show the strongest  
25 fitness loss per generation, but intermediate shift speeds lead to the strongest fitness loss per  
26 geographic distance. Range shifting species lose fitness more slowly through time than  
27 expanding species, however, their fitness compared at equivalent geographic distances spread  
28 can be considerably lower. These counter-intuitive results arise from the combination of time  
29 over which selection acts and mutations enter the system. Range shifts also exhibit reduced  
30 fitness recovery after a geographic shift and may result in extinction, whereas range expansions  
31 can persist from the core of the species range. The complexity of range expansions and range  
32 shifts highlights the potential for severe consequences of environmental change on species  
33 survival.

## 34 Author Summary

35           As environments change through time across the globe, species must adapt or relocate to  
36 survive. Specialized species must track the specific moving environments to which they are  
37 adapted, as compared to generalists which can spread widely. During colonization of new  
38 habitat, individuals can accumulate deleterious alleles through repeated bottlenecks. We show  
39 through simulation and analytic modeling that the process by which these alleles accumulate

40 changes depending upon the speed at which populations spread over a landscape. This is due to  
41 the increased efficacy of selection against deleterious variants at slow speeds of range shifts and  
42 decreased input of mutations at faster speeds of range shifts. Under some selective  
43 circumstances, shifting of a species range leads to extinction of the entire population. This  
44 suggests that the rate of environmental change across the globe will play a large role in the  
45 survival of specialist species as compared to more generalist species.

## 46 Introduction

47 The rate of environmental change experienced by organisms plays a major role in driving  
48 evolution and determining species survival. Global climate change is just one example of a force  
49 driving environmental change. The rate of climate warming is unprecedented in recent history  
50 (Huntley 1991) and is predicted to continue into the future (Loarie *et al.* 2009), threatening the  
51 survival of many species (Bellard *et al.* 2012, Davis & Shaw 2001, Jump & Peñuelas 2005,  
52 Parmesan & Yohe 2003, Thomas 2010). Regardless of the cause of environmental change,  
53 organisms must either adapt or shift their range to find suitable environments, and many species  
54 already show evidence of range shifts (Chen *et al.* 2011, Frei *et al.* 2010, Grabherr *et al.* 1994,  
55 IPCC 2007, Kullman 2002, Lenoir & Svenning 2015, Lloyd & Fastie 2003, Parmesan & Yohe  
56 2003, Peñuelas & Boada 2003, Pinsky *et al.* 2013, Sanz-Elorza *et al.* 2003, Sturm *et al.* 2001,  
57 Walther 2003, Walther *et al.* 2002). Surviving a range shift is not as simple as tracking an  
58 environmental optimum via sufficient dispersal due to the complex genetic, selective, and  
59 demographic processes contributing to fitness loss as populations move over geographic space.

60 Individuals on expanding fronts are known to accumulate deleterious mutations over time  
61 and space, leading to fitness loss (termed expansion load, Peischl *et al.* 2013) that could lead to  
62 extirpation of local populations or the extinction of species. Expansion load is the consequence

63 of genetic surfing of deleterious mutations at expanding range fronts (Edmonds *et al.* 2004,  
64 Klopstein *et al.* 2006), where inefficient selection due to small population size prevents the  
65 purging of deleterious variants, leading to severe fitness loss. This expansion load creates a  
66 gradient of fitness across species ranges, where high fitness individuals persist in the core of the  
67 species range and low fitness individuals exist at the edge. Theoretical models of range  
68 expansions well predict the accumulation of expansion load (Excoffier *et al.* 2009, Gilbert *et al.*  
69 2017, Hallatschek & Nelson 2010, Peischl *et al.* 2013, 2015, Peischl & Excoffier 2015, Travis *et*  
70 *al.* 2007), and empirical evidence of such load continues to emerge (Bosshard *et al.* 2017,  
71 González-Martínez *et al.* 2017, Henn *et al.* 2016, Peischl *et al.* 2018, Willi *et al.* 2018). We  
72 expect similar processes to occur during range shifts, however, little work has investigated the  
73 fitness consequences of a range shift. The combination of variable speeds of spread over the  
74 landscape with the lack of a dense, genetically diverse and high fitness species core is expected  
75 to greatly impact the dynamics of expansion load at the expanding front. When spread is fast,  
76 populations exhibit smaller population sizes at the front leading to stronger genetic drift and thus  
77 greater expansion load. Gilbert *et al.* (2017) showed that when range expansions are slowed by  
78 the need to locally adapt, the severity of expansion load is reduced. Other processes that slow  
79 expansion are also expected to reduce fitness loss during a range shift, such as Allee effects  
80 which require a population to reach a given size before growing and expanding further (Stephens  
81 *et al.* 1999). Furthermore, the absence of migration from behind the expanding front is also  
82 expected to reduce recovery after a shift.

83         Here, we investigate the loss of fitness due to expansion load in both range expansions  
84 and range shifts to understand the important demographic and genetic differences across these  
85 scenarios. We assume that range expansions spread at the limit of individuals' dispersal abilities,

86 while range shifts spread at a speed determined by the rate of environmental change, maintaining  
87 a constant population width which expands at the front and recedes at the rear. We also compare  
88 how these different demographic scenarios may lead to different dynamics of population  
89 recovery, given that gene flow from the species core is a major factor in recovery for expansions  
90 and will be lacking in range shifts. We assess the impact that speed of environmental change has  
91 on the severity of fitness loss during a range shift. These results have implications for the  
92 persistence of species in the face of global climate change and how various demographic  
93 scenarios can lead to different outcomes for species in terms of genetic diversity and population  
94 fitness.

## 95 Results

### 96 Range shifts lead to greater fitness loss per distance

#### 97 *Soft selection*

98 We compared the evolution of mean fitness at the leading edge of an unconstrained range  
99 expansion with range shifts in which the speed of the shift is constrained by extrinsic forces such  
100 as environmental change. Importantly, the speed of the unconstrained range expansion sets a  
101 limit for the upper speed at which a range shift can successfully track a moving environmental  
102 niche. We find that rate of fitness loss per generation is less severe in range shifting species than  
103 in expanding species (Fig 1A and 1B, Table S1), but the speed at which the range shifts proceed  
104 is a key factor determining the rate of fitness loss per generation. When the speed of the shift is  
105 close to the speed of a range expansion (speed  $v = 0.2$  demes per generation vs.  $v \cong 0.26$   
106 respectively, Fig 1), expansions and shifts, have similar rates of fitness loss per generation (Fig

107 1A and 1B). Decreasing the speed of range shifts leads to less fitness loss per generation (Fig 1A  
108 and 1B), as expected. Surprisingly however, the rate of fitness loss per unit space is greatest at  
109 intermediate speeds of range shifts (Fig 1C and 1D). When mutations are fully additive, the  
110 fitness of a range shifting species is lower than that of a range expanding species when compared  
111 at the same distance travelled (Fig 1C). With fully recessive mutations, faster shifts and  
112 expansions initially experience more fitness loss per deme than slower shifts. This is because  
113 recessive mutations can be maintained at higher frequencies under mutation-selection balance  
114 prior to a shift or expansion, and strong drift at the expansion front leads to rapid expression of  
115 these alleles in the homozygous state even though the average number of deleterious alleles per  
116 individual remains constant (Kirkpatrick and Jarne 2001, Peischl & Excoffier 2013). This is  
117 reflected in the higher number of fixed deleterious variants at the front when mutations are  
118 recessive (Fig S1). Slower shifts avoid this initial rapid increase in homozygosity because drift is  
119 less strong but do have a steeper slope of fitness loss per space overall and eventually lose more  
120 fitness overall as compared to the fastest shifts (Fig 1D). At the slowest speed of range shifts, our  
121 simulations deviate from the analytic model (Fig 1A and 1B) because at these slower speeds  
122 migration from behind the front has time to reach the range edge, which is not a factor included  
123 in our analytic model.

124 To further understand the relationship between the speed of a range shift and fitness loss  
125 per unit space, we compared our analytical model to additional simulations ( $v = 0.2, 0.1, 0.066,$   
126  $0.05, 0.04, 0.033, 0.025,$  and  $0.02$  demes per generation; Fig 2). Our model predicts that the  
127 fitness loss per unit of space is maximized at a critical speed of approximately  $v_c \approx$   
128  $s(2F - 1)/(2\varphi - 1) = 0.056$  demes per generation, which matches our simulation with the most  
129 severe fitness loss at  $v = 0.05$  (Fig 2B). Our model allows us to disentangle the evolutionary

130 forces that govern the accumulation of deleterious mutations during range shifts. As shifts  
131 proceed faster, the time taken to colonize a new deme is reduced thereby decreasing the average  
132 number of mutations that will spontaneously enter the population (Fig 2C). Furthermore, as  
133 shifts proceed faster, population sizes are on average smaller at the front (Hallatschek 2008)  
134 leading to more genetic drift and gene surfing. This decrease in  $N_e$  leads to a higher probability  
135 of fixation for deleterious alleles and a lower probability of fixation for beneficial alleles (Fig  
136 2D, Peischl *et al.* 2016), resulting in slower range shifts always exhibiting less fitness loss per  
137 unit time (Fig 2A). The trade-off between efficacy of selection (more selection during slower  
138 shifts) and the amount of influx of harmful mutations during a range shift (more mutations  
139 during slower shifts) creates the non-monotonic behavior we find in both the analytic model and  
140 simulations (Fig 2B). This non-monotonic behavior persists across a range of carrying capacities  
141 and migration rates, with larger population sizes, migration rates or stronger selection leading to  
142 faster critical speeds (Supplemental Fig S2). With an increasing influx of deleterious mutations,  
143 a wider range of shift speeds lead to greater fitness loss than a range expansion, while increasing  
144 the efficacy of selection (either via larger carrying capacities, less severe founder effects, or  
145 stronger selection) leads to fewer speeds at which range shifts suffer more fitness loss than  
146 expansions.

#### 147 *Hard Selection*

148 Under hard selection, we find a qualitatively different result where range shifting species  
149 can go extinct for the parameter values we used (Fig 3). Because the speed of spread depends on  
150 fitness under hard selection, populations can no longer track the speed of environmental change  
151 as fitness decreases, resulting in extinction. For the fastest shift ( $v = 0.2$ ), extinction occurs when  
152 fitness drops to approximately 0.75-0.78, while the slower shifting species ( $v = 0.05, 0.02$ )

153 survive longer until fitness decreases to approximately 0.52-0.58. Growth rates are still positive  
154 for these fitness values, and stationary populations with this fitness would not go extinct. Our  
155 analytical model shows that range shifts can lead to extinction because low-fitness populations  
156 can no longer grow sufficiently fast to colonize new habitat, leading to a decline in population  
157 size as the landscape disappears behind the shifting range (Fig S3). Range expansions are also  
158 slowed due to fitness loss at the expanding front ( $v = 0.176$  under the additive model), but  
159 extinction does not occur since the population can persist over the whole simulated landscape  
160 and be sustained by migrants from the core of the species range. Under the recessive model,  
161 fitness loss during expansions is so large that the expanding front stalls until fitness recovers  
162 sufficiently to allow further spread. In this case, speed is significantly slowed, and the landscape  
163 is not fully crossed during the course of the simulation (populations on average travel 242.6  
164 demes over 5000 generations;  $v = 0.049$ ).

#### 165 [Recovery after expansion](#)

166 In all simulated cases, recovery from accumulated deleterious load is faster and of higher  
167 magnitude after a range expansion than after range shifts. Both shifts and expansions exhibit an  
168 initial lag in fitness recovery upon crossing the landscape (Fig 1A and 1B) which can be  
169 explained by the slower fixation of beneficial mutations once surfing has stopped (Fig S1).  
170 Expansions accumulated the least load overall, and thus had less load to recover from (Table S1),  
171 yet still show higher rates of recovery than the range shift models (Fig 1A and 1B). Range shifts  
172 accumulated more fixed deleterious load than range expansions, and still show minor increases  
173 in fixed load after the shift has stopped. In contrast, fixed deleterious load is purged after  
174 expansions during this recovery phase (Fig S1). Neutral diversity also returns to a much higher  
175 level after an expansion as compared to a shift (average heterozygosity = 0.2 vs. 0.125,



176 respectively; Fig S4). Beneficial mutations show similar rates of increase in fixation during  
177 expansions and shifts, but significantly higher rates in the recovery phase for range expansions  
178 versus range shifts (Fig S1). Differences in recovery between expansions and shifts arise due to  
179 two factors. First, the migration of beneficial variants from the core to the edge of the range  
180 reintroduces polymorphism, which is impossible in case of a shift since the core has disappeared.  
181 Second, the effective population size is overall much smaller in our range shifts (see  
182 Supplemental Figs S5-S6 for further discussion on the effects of  $N_e$  on fitness recovery).

### 183 Incomplete dominance and complex DFEs

184 We relaxed several assumptions of our mutation model by varying the dominance  
185 parameter to include partially recessive mutations and using an exponential distribution of  
186 mutational effect sizes (DFE) as described in the Methods. During the initial expansion phase of  
187 either shifts or expansions, the rate of fitness loss is minimally affected by these mutational  
188 parameters (Figure 4). Only in a single case ( $v = 0.1$ ) does mean fitness loss at the front show a  
189 reduced but non-significant rate of fitness loss with an exponential DFE as compared to the  
190 additive model with a constant  $s$  (Fig 4C). Mutational parameters have a stronger impact,  
191 however, on the recovery phase after an expansion or shift. When  $s$  follows an exponential  
192 distribution (regardless of the dominance model), fitness recovers at a faster rate as selection  
193 increases the frequency of large effect beneficial mutations (Fig S7). The cases with an  
194 exponential DFE also show the absence of a lag in fitness recovery once the expansion or shift  
195 has stopped. Note that the recovery slows down towards the end of the course of the simulations  
196 for range expansions (Fig 4A) because available loci for beneficial alleles begin to saturate (Fig  
197 S8B). Importantly, the trade-off modelled between  $h$  and  $s$  did not generate results qualitatively  
198 different than those obtained for a constant dominance coefficient of  $h = 0.3$ . This is reassuring,

199 as very little is known about such a trade-off and more research is needed before we can  
200 confidently estimate the genomic distribution of dominance coefficients in nature. Thus, while  
201 the degree of dominance of new mutations has a bigger impact on fitness loss during the initial  
202 expansion phase, the most important factor explaining differences in the rate of recovery in our  
203 simulations is the distribution of fitness effects of new mutations.

## 204 Discussion

205 How species modify their ranges in response to environmental change has a large impact  
206 on how evolutionary processes unfold within populations. In this study, we have investigated  
207 genetic diversity and population fitness both during and after range shifts and contrasted these  
208 results to those of a pure range expansion. We uncover two striking results. First, the speed of  
209 environmental change driving a range shift is pivotal in determining the dynamics of fitness  
210 change over time and space. The severity of fitness loss per unit time qualitatively differs from  
211 fitness loss per unit distance, where intermediate speeds accumulate the most expansion load per  
212 distance travelled while fastest speeds accumulate the most load per generation time. Second, the  
213 mechanism of selection – hard selection or soft selection – leads to qualitatively different  
214 outcomes, where range shifts can lead to species extinction under hard selection. These results  
215 are vital for predicting population persistence or for implementing reintroduction or other  
216 conservation efforts to augment natural populations.

### 217 Fitness loss in time versus space

218 We have found that since range shifts are forced to proceed more slowly than pure range  
219 expansions, fitness loss per unit time is decreased. This is in agreement with previous models of  
220 range expansions where it is now well established that faster expansions lead to stronger genetic

221 drift and greater accumulation of deleterious expansion load at the front (Gilbert *et al.* 2017,  
222 Hallatschek & Nelson 2008, 2010, Peischl *et al.* 2013). When measuring fitness loss per unit  
223 distance travelled, however, we find that range shifts can experience greater fitness loss than  
224 expansions for equivalent distances spread. The most severe fitness loss for range shifts is at  
225 intermediate speeds, creating a non-monotonic relationship between fitness loss per distance and  
226 speed of range shift. This unexpected and counterintuitive pattern of fitness loss results from the  
227 fact that the number of generations necessary to travel a given distance determines the number of  
228 mutations entering the population as well as the time over which selection may act on those  
229 mutations. This effect is seen because the speed at which a range shifting species moves through  
230 space is not dispersal- or growth-limited but is limited by the environmental niche which the  
231 species occupies. Eventually a range shift (or expansion) that proceeds sufficiently slowly would  
232 accumulate no expansion load at the front. Our analytic model (Fig 2) predicts this speed at  $\approx$   
233 0.0216 demes per generation, while simulations exhibit a slightly slower speed of 0.017 demes  
234 per generation ( $v = 1/60$ ) under the additive mutation model and 0.012 demes per generation ( $v =$   
235  $1/84$ ) for the recessive model (Supplemental Fig S10).

236         The variable effect of speed on fitness lost during range shifts has important evolutionary  
237 implications. The rate of climate change or of anthropogenic changes to the environment will  
238 play a major role in determining how fast species must move and thus how much they may suffer  
239 from expansion load. Our simulated speed of range shifts is enforced by the environment,  
240 meaning that specialist species which must track shifting environmental optima may, under  
241 certain conditions, fare better against the input of mutational load when shifts proceed over fewer  
242 generations, but only up to the point where too rapid environmental change results in extinction.  
243 This may initially bode well for species living on elevational gradients, where environmental

244 change is often greater over shorter distances than latitudinal gradients, requiring less distance  
245 travelled to track a moving optimal habitat (until habitat disappears at mountaintops). It is  
246 difficult to project our simulated speeds onto real-world speeds of environmental change, as they  
247 are specific to our parameter set. Life history traits, generation times, and dispersal abilities of  
248 specific species will vary and lead to different degrees of fitness loss for range shifting species.  
249 Even though the slowest environmental change is favorable for species survival during range  
250 shifts and should imply minimal fitness loss both per time and distance travelled (Fig 2A and  
251 2B), there is clearly no universal optimal speed at which a range shift can proceed, emphasizing  
252 the need for species-specific conservation efforts and improved understanding of the interaction  
253 between adaptive and dispersive abilities in response to environmental change.

#### 254 [Hard versus soft selection](#)

255 At the extreme end of the differences between range shifts and range expansions, we see  
256 that range shifting species can go extinct under hard selection, whereas expanding species always  
257 survive. Under hard selection population growth depends on fitness. As a consequence, the speed  
258 of an expansion is not necessarily dispersal-limited, but instead limited by low fitness and  
259 therefore reduced population growth. During range shifts, when fitness drops below the critical  
260 level for population sustenance, populations can no longer keep pace with the shifting  
261 environment. In the absence of a species core this leads to extinction and is another important  
262 effect of the speed of environmental change on the survival of specialist species undergoing  
263 range shifts.

264 Both hard and soft selection are relevant to real-world species and thus to models of  
265 range expansions and shifts: organisms that produce offspring in vast amounts may be most  
266 subject to local competition and soft selection, while organisms with low reproductive output and

267 high parental investment may experience more hard selection. For example, cane toads, where  
268 one mother can produce from 8,000-25,000 eggs in a single clutch (Tyler 1989) would be subject  
269 to soft selection and are a classic example of range expansion during their invasive spread  
270 throughout northern Australia (Urban *et al.* 2007). On the other hand, many of the world's large  
271 carnivores suffering from human-induced range contractions (Wolf & Ripple 2017) may  
272 experience hard selection.

273 Understanding which species are most likely to undergo range shifts rather than range  
274 expansions is thus essential for conserving biodiversity into the future. Specialist species are  
275 more likely to shift their range, while generalists are more likely to expand an existing range.  
276 Furthermore, specialists that shift over latitudes may travel greater geographic distances than  
277 specialists that shift shorter distances over elevation along mountain slopes to track their  
278 environment. This may potentially put latitudinally shifting species at greater risk to suffer from  
279 expansion load (with the additional caveat that mountainside species will eventually run out of  
280 elevation and likely go extinct).

## 281 [Demography and mutational parameters impact recovery rates](#)

282 Recovery from expansion load has not been thoroughly examined in previous studies of  
283 range expansions. The presence of a high-fitness species core clearly prevents extinction in the  
284 case of hard selection and allows for greater fitness recovery in all cases due to the ability of  
285 migrants from behind the expanding front to replenish genetic diversity at the edge. Range shifts  
286 lack this recovery mechanism because the core and its high fitness individuals go extinct due to  
287 the changing environment. This emphasizes the need to maximally conserve species ranges in  
288 their entirety, not only in limited or fragmented sections, and particularly the species range core

289 where individuals are expected to be of higher fitness and possess greater genetic diversity  
290 (Eckert *et al.* 2008, Vucetich & Waite 2003).

291       Effective population size and the connectivity of populations plays a role in recovery  
292 from expansion, as is visible in 2-dimensional landscape models (Supplementary Figs S5-S6).  
293 Although it is difficult to directly disentangle the effect of the 2-D landscape versus the effect of  
294 different effective population sizes, both larger populations and more substructured populations  
295 show higher fitness recovery after both expansions and shifts. This is in agreement with previous  
296 models which found that 2-D landscapes allow multiple fronts of expansion at which some  
297 would experience less fitness loss than others (Peischl *et al.* 2013). Selection can increase the  
298 frequency of beneficial mutations and purge deleterious load more efficiently in large  
299 populations, and migration among genetically diverse subpopulations with different fixed  
300 deleterious alleles can eliminate fixed expansion load. Future simulations implementing even  
301 wider 2-D landscapes should be tested, as we would expect shifts to exhibit greater recovery  
302 since more genetic diversity would be maintained in a larger population.

303       The distribution of fitness effects (DFE) of new mutations is also an important factor for  
304 population recovery. The true DFE across species and populations still needs to be better  
305 understood, but there is general agreement that deleterious mutations have complex and multi-  
306 modal distributions (Eyre-Walker & Keightley 2007). Though an exponential DFE did not  
307 greatly impact patterns during expansion or shifts in our simulations, post-expansion recovery  
308 was greatly improved with an exponentially distributed DFE relative to constant deleterious and  
309 beneficial mutational effects (Fig 4), largely because of fixation of highly beneficial variants (Fig  
310 S7). The distribution of mutational fitness effects that results after an expansion or shift may also  
311 vary depending on the speed of expansion, as has previously been shown by Gilbert *et al.* (2017).

312 Similar to how Balick *et al.* (2015) proposed that the signature left behind by mutations of  
313 various dominance levels after bottlenecks could be used to infer the dominance parameter,  $h$ ,  
314 experiments measuring fitness recovery after expansions or shifts may provide insight into  
315 inferences of the DFE.

## 316 Future Directions

317 Several interesting future studies are merited from this study. First, further theoretical  
318 studies should include the evolution of dispersal. If dispersal rates are able to evolve to higher or  
319 lower rates than what is enforced at the start of the simulation, selection may favor less dispersal  
320 to reduce expansion load. On the other hand, we would expect range shifting species with higher  
321 dispersal abilities to survive longer in the face of environmental change. Burton *et al.* (2010)  
322 investigated life history trade-offs in the presence of a dense species core, finding selection for  
323 greater dispersal at the edge. However, further investigation is needed to investigate if this result  
324 holds in the absence of a dense core. A previous metapopulation model showed higher dispersal  
325 evolution as a mechanism of inbreeding avoidance when deleterious mutations are highly  
326 recessive (Guillaume & Perrin 2006), emphasizing the importance to better characterize DFEs  
327 and dominance parameters along with dispersal evolution to fully understand their effects on  
328 expansion load. Second, combining the ability of range shifting species to not only move but also  
329 simultaneously adapt to new environmental conditions may lead to qualitatively different results  
330 for fitness loss or survival/extinction under hard selection. This type of model could apply to  
331 specialist species that may have some adaptive capacity yet still shift to follow their  
332 environmental niche.

333 Last and most important will be to test the predictions of this model with real data. Both  
334 experimental evolution and empirical studies in the wild are capable of addressing our results.

335 Bacterial or other experimental studies in the lab could enforce fixed speeds of range shifts and  
336 assay fitness across resulting populations. In nature, thorough census data would be necessary to  
337 identify species undergoing shifts, but once known comparing the prevalence of deleterious  
338 mutations relative to related species that have not undergone range shifts can shed light on these  
339 processes. The implications of this study are extremely relevant to biodiversity conservation in  
340 today's world of environmental change, and thus understanding how these factors are realized in  
341 real organisms is a vital next step. As climate change proceeds and environments across the  
342 globe change at increasingly variable rates, considering the genetic impacts of range shifts may  
343 be vital to predict the persistence of many species.

## 344 Methods

345 We used C++ code for individual-based simulations modified from Peischl & Excoffier  
346 (2015; available on GitHub at <https://github.com/kjgilbert/ExpLoad>) to model range expansions  
347 and range shifts over 1- and 2-dimensional discrete space. We follow populations of diploid,  
348 monoecious individuals both during the expansion phase as well as after expansion has finished.  
349 Random mating occurs within each deme, and generations are discrete and non-overlapping.  
350 Dispersal occurs only to adjacent demes with probability  $m = 0.1$  per generation and is reflective  
351 at the landscape boundaries. Population growth is logistic within each deme (Beverton & Holt  
352 1957). Each deme has a carrying capacity,  $K$ , of 100 unless otherwise specified and a logistic  
353 growth rate model defined by  $N_{t+1} = N_t^R / \left(1 + N_t \left(\frac{R-1}{K}\right)\right)$ , where  $R = 2$  and  $\log(R)$  is the  
354 intrinsic growth rate. We compare models of both hard and soft selection (Wallace 1975) where  
355 carrying capacity and growth rate are constant under soft selection, and carrying capacity and



356 growth rates are proportional to population mean fitness under hard selection (as in Peischl *et al.*  
357 2015).

358 Both models begin with individuals seeded onto the 5 or 25 left-most demes of a 1x300  
359 or 5x300 landscape grid, for one-dimensional or two-dimensional expansions, respectively, and  
360 undergo a burn-in phase of 4,000 generations to reach mutation-selection equilibrium, during  
361 which individuals cannot migrate into new, empty demes. In the range expansion model, all  
362 empty space on the remaining landscape is opened at the end of the burn-in phase, which allows  
363 individuals to colonize and spread at their innate dispersal rate. In the range shift model, both the  
364 rate of expansion at the front and the rate of retraction at the rear edge are controlled by  
365 maintaining a constant-sized habitat width of 5 or 5x5 demes with  $K > 0$ , which can be occupied  
366 by the population. Range shifts all proceed slower than the range expansions, otherwise they  
367 result in extinction. We define a constant speed of range shift as  $v = l/T$  where  $T$  is the number of  
368 generations between each successive movement forward of the population.  $T = 5$  ( $v = 0.2$ ) opens  
369 an empty deme at the range front (and forces extinction at the trailing deme) every 5 generations  
370 and is our fastest simulated speed of a range shift. This closely approximates the realized speed  
371 of the standard range expansion ( $v \cong 0.25$ ,  $T \cong 4$ , Table S1), which results from the maximum  
372 growth and dispersal rates used in our model. This model mimics specialist species that must  
373 shift their range in either latitude or altitude to track a moving environmental optimum.

374 Fitness of individuals is determined by 1000 freely recombining, bi-allelic loci and is  
375 assumed multiplicative across all loci. We compare both hard and soft selection (see Wallace  
376 1975 for further description of these models). New mutations occur at a genome-wide mutation  
377 rate of  $U = 0.1$  mutations per diploid individual per generation. Mutations are unidirectional, that  
378 is, we prevent back-mutations, and we assume that mutations at 90% of the loci have deleterious

379 fitness effects and 10% have beneficial effects to match previous simulations (Peischl *et al.*  
380 2013, Peischl *et al.* 2015). We ignore beneficial mutations during the burn-in phase, since  
381 otherwise all beneficial loci would be fixed for the derived allele before expansion begins and no  
382 new beneficial mutations would occur during the expansion. Fitness is scaled to 1 at the end of  
383 the burn-in phase to make all scenarios comparable. We examine two main types of dominance  
384 models for mutational effects: fixed selection coefficients,  $s$ , across all mutations of  $\pm 0.005$   
385 (corresponding to a  $4Ks$  value of 2) with  $h = 0.5$  (additive model) or  $h = 0.0$  (fully recessive  
386 model), where the fitness contribution at a locus for a heterozygote is  $1 + hs$ , and  $1 + s$  for a  
387 mutant homozygote.

388 In a subset of simulations, we investigate the impact of partial dominance through three  
389 additional mutation models: (1) where  $h = 0.3$  (partially recessive) across all 900 loci with  
390 deleterious effects fixed at  $s = -0.005$ , (2)  $h = 0.3$  and these 900 loci have deleterious fitness  
391 effects drawn from an exponential distribution with mean  $s = -0.005$ , or (3) the same exponential  
392 distribution of fitness effects (DFE) for deleterious mutations and a trade-off  $h$ - $s$  relationship.  
393 The 100 beneficial loci maintain a constant  $h = 0.5$  and have a mirrored exponential distribution  
394 to that of the deleterious mutations. More research is needed to understand what distribution of  $h$   
395 and  $s$  values is most true in biology, but there is evidence to suggest that more deleterious  
396 mutations are more recessive (Manna *et al.* 2011, Agrawal & Whitlock 2011). To test if such a  
397 difference in our model affects the outcome, we define an  $h$ - $s$  relationship with  $h = f(s) =$

398  $\frac{1}{\left(\frac{1}{\theta_i} - s\theta_r\right)}$ , from Huber *et al.* (2017). This relationship is defined by two parameters: we set  $\theta_i$   
399  $= 0.5$ , which is the intercept of the model defining the value of  $h$  when  $s = 0$ , and  $\theta_r$  is set to 2500  
400 which defines the rate that dominance approaches 0 (fully recessive) as mutation effects become  
401 more deleterious (see Supplemental Fig S9). This creates a distribution where dominance

402 approaches complete additivity as neutrality is approached, and dominance approaches complete  
403 recessivity as lethality is approached. Even less is known about the DFE of beneficial mutations  
404 and hence we model the 100 beneficial loci equivalently across these three comparison cases: an  
405 exponential distribution of effect sizes, with mean  $s = 0.005$  and a constant  $h = 0.5$ . To compare  
406 levels of neutral genetic diversity post-expansion, 1000 unlinked neutral loci are included in a  
407 subset of simulations. To investigate the effects of population substructure and varying effective  
408 population size at the expansion front, we also simulated 2-dimensional landscapes, as described  
409 in Supplemental Figs S5-S6.

#### 410 [Analytic model for range expansions and shifts](#)

411 We compare our simulation results to an analytic model of expansions and shifts under a  
412 soft selection model. Peischl *et al.* (2015) showed that the change in mean relative fitness at the  
413 front of a linear expansion along an array of discrete demes can be approximated using the  
414 following equation:

$$415 \quad \bar{w}_f(t+1) = \bar{w}_f(t) \left( 1 + \int_{-1}^{\infty} u(s) Kp\left(sT, F, \frac{1}{2F}\right) ds \right), \quad (1)$$

416 where  $u(s)$  is the mutation rate of mutations with effect  $s$ , and  $p(sT, F, p_0) = (1 -$   
417  $\exp(-2FsTp_0)) / (1 - \exp(-2FsT))$  is the fixation probability of mutations with effect  $s$  and  
418 initial frequency  $p_0$  at the front.  $F$  is the number of founders of a new deme during the  
419 expansion, and  $T$  is the time between two consecutive colonization events. Note that in this  
420 model, selection acts during these  $T$  generations, after which drift acts as a founder effect by  
421 randomly sampling  $F$  individuals. In the case of range expansions, we matched  $T$  to the average  
422 observed speed of range expansion in simulations ( $T = 3.9$ ). We set the relative fitness at the

423 onset of the expansion to  $\bar{w}_f(0) = 1$  to ensure comparability across results. To compare our  
424 results to simulations we assume that  $F = K m/2$  (Peischl *et al.* 2015).

## 425 Acknowledgements

426 We would like to thank \_\_\_\_\_. KJG was supported by EMBO long-term fellowship ALTF2-2016  
427 and LE by Swiss NSF grant No 310030B-166605.

## 428 Data Availability

429 All simulated data can be regenerated from the parameter sets in Supplementary Table S2. Code  
430 for performing the simulations can be downloaded from GitHub at  
431 <https://github.com/kjgilbert/ExpLoad>.

## 432 References

- 433 Agrawal AF, Whitlock MC. Inferences about the distribution of dominance drawn from yeast  
434 gene knockout data. *Genetics*, 2011; 187: 553–566.
- 435 Balick DJ, Do R, Cassa CA, Reich D, Sunyaev SR. Dominance of deleterious alleles controls the  
436 response to a population bottleneck. *PLoS Genetics*, 2015; 11(8): e1005436.  
437 doi:10.1371/journal.pgen.1005436
- 438 Bellard C, Bertelsmeier C, Leadley P, Thuiller W, Courchamp F. Impacts of climate change on  
439 the future of biodiversity. *Ecology Letters*, 2012; 15(4): 365-377.
- 440 Beverton RJH, Holt SJ. On the Dynamics of Exploited Fish Populations. Chapman and Hall,  
441 London, 1957; Facsimile reprint 1993; 533 pp.

- 442 Bosshard L, Dupanloup I, Tenaillon O, Bruggmann R, Ackermann M, Peischl S, Excoffier L.  
443 Accumulation of deleterious mutations during bacterial range expansions. *Genetics*, 2017;  
444 207(2): 669-684.
- 445 Chen I-C, Hill JK, Ohlemüller R, Roy DB, Thomas CD. Rapid range shifts of species associated  
446 with high levels of climate warming. *Science*, 2011; 333(6045): 1024-1026.
- 447 Crick HQP, Sparks TH. Climate change related to egg-laying trends. *Nature*, 399: 423.
- 448 Davis MB, Shaw RG (2001) Range shifts and adaptive responses to Quaternary climate change.  
449 *Science*, 1999; 292: 673-679.
- 450 Eckert CG, Samis KE, Loughheed SC. Genetic variation across species' geographical ranges: the  
451 central-marginal hypothesis and beyond. *Molecular Ecology*, 2008; 17(5): 1170-1188.
- 452 Edmonds CA, Lillie AS, Cavalli-Sforza LL. Mutations arising in the wave front of an expanding  
453 population. *Proc. Natl. Acad. Sci.* 2004; 101: 975–979.
- 454 Excoffier L, Foll M, Petit RJ. Genetic consequences of range expansions. *Annual Review of*  
455 *Ecology, Evolution, and Systematics*, 2009; 40: 481–501.
- 456 Eyre-Walker A, Keightley PD. The distribution of fitness effects of new mutations. *Nature*  
457 *Reviews Genetics*, 2007; 8: 610-618.
- 458 Forchhammer MC, Post E, Stenseth NC. Breeding phenology and climate. *Nature*, 1998; 391:  
459 29-30.
- 460 Frei E, Bodin J, Walther G-R. Plant species' range shifts in mountainous areas – all uphill from  
461 here? *Botanica Helvetica*, 2010; 120(2): 117-128.
- 462 González-Martínez SC, Ridout K, Pannell JR. Range Expansion Compromises Adaptive  
463 Evolution in an Outcrossing Plant. *Current Biology*, 2017; 27(16): 2544-2551.
- 464 Grabherr G, Gottfried M, Pauli H. Climate effects on mountain plants. *Nature*, 1994; 369: 448.

- 465 Guillaume F, Perrin N. Joint evolution of dispersal and inbreeding load. *Genetics*, 2006; 173,  
466 497–509.
- 467 Hallatschek O, Nelson DR. Gene surfing in expanding populations. *Theoretical Population*  
468 *Biology*, 2008; 73(1): 158-170.
- 469 Hallatschek O, Nelson DR. Life at the front of an expanding population. *Evolution*, 2010; 64:  
470 193–206.
- 471 Henn BM, Botigué LR, Peischl S, Dupanloup I, Lipatov M, Maples BK, Martin AR, Musharoff  
472 S, Cann H, Snyder MP, Excoffier L, Kidd JM, Bustamante CD. Distance from sub-Saharan  
473 Africa predicts mutational load in diverse human genomes. *PNAS*, 2016; 113(4): E440-  
474 E449.
- 475 Huber CD, Durvasula A, Hancock AM, Lohmueller KE. Gene expression drives the evolution of  
476 dominance. *Biorxiv*, 2017; doi: <https://doi.org/10.1101/182865>.
- 477 Huntley B. How plants respond to climate change – migration rates, individualism and the  
478 consequences for plant communities. *Ann. Bot. (Lond)*., 1991; 67, 15–22.
- 479 IPCC. Climate change 2007: impacts, adaptation and vulnerability. *Contribution of Working*  
480 *Group II to the Fourth Assessment Report of the Intergovernmental Panel on Climate*  
481 *Change* (ed. By ML Parry, OF Canziani, J Palutikof, PJ van der Linden and CE Hanson),  
482 pp. 1-976. Cambridge University Press, Cambridge; 2007.
- 483 Jump A, Peñuelas J. Running to stand still: adaptation and the response of plants to rapid climate  
484 change. *Ecology Letters*, 2005; 8(9): 1010-1020.
- 485 Kirkpatrick M, Jarne P. The effects of a bottleneck on inbreeding depression and the genetic  
486 load. *The American Naturalist*, 2000; 155(2): 154-167.

- 487 Klopstein S, Currat M, Excoffier L. The fate of mutations surfing on the wave of a range  
488 expansion. *Molecular Biology and Evolution*, 2006; 23: 482-490.
- 489 Kullman L. Rapid recent range-margin rise of tree and shrub species in the Swedish Scandes. *J.*  
490 *Ecol.*, 2002; 90, 68–77.
- 491 Lenoir J, Svenning J-C. Climate-related range shifts – a global multidimensional synthesis and  
492 new research directions. *Ecography*; 38(1): 15-28.
- 493 Lloyd AH, Fastie CL. Recent changes in treeline forest distribution and structure in interior  
494 Alaska. *Ecoscience*, 2003; 10: 176–185.
- 495 Loarie SR, Duffy PB, Hamilton H, Asner GP, Field CB, Ackerly DD. The velocity of climate  
496 change. *Nature*, 2009; 462, 1052-1055.
- 497 Manna F, Martin G, Lenormand T. Fitness Landscapes: An Alternative Theory for the  
498 Dominance of Mutation. *Genetics*, 2011; 189(3): 923-937.
- 499 Parmesan C, Yohe G. A globally coherent fingerprint of climate change impacts across natural  
500 systems. *Nature*, 2003; 421: 37–42.
- 501 Peischl S, Dupanloup I, Bosshard L, Excoffier L. Genetic surfing in human populations: from  
502 genes to genomes. *Current Opinion in Genetics and Development*, 2016; 41: 53-61.
- 503 Peischl S, Dupanloup I, Kirkpatrick M, Excoffier L. On the accumulation of deleterious  
504 mutations during range expansions. *Molecular Ecology*, 2013; 22: 5972–5982.
- 505 Peischl S, Excoffier L. Expansion load: recessive mutations and the role of standing genetic  
506 variation. *Molecular Ecology*, 2015; 24(9): 2084-2094.
- 507 Peischl S, Kirkpatrick M, Excoffier L. Expansion load and the evolutionary dynamics of a  
508 species range. *American Naturalist*, 2015; 185: E81–E93.

- 509 Peischl S, Dupanloup I, Foucal A, Jomphe M, Bruat V, Grenier J-C, Gouy A, Gilbert KJ, Gbeha  
510 E, Bosshard L, Hip-Ki E, Agbessi M, Hodgkinson A, Vézina H, Awadalla P, Excoffier L.  
511 Relaxed Selection During a Recent Human Expansion. *Genetics*, 2018; 208(2): 763-777.
- 512 Peñuelas J, Boada M. A global change-induced biome shift in the Montseny Mountains (NE  
513 Spain). *Global Change Biol.*, 2003; 9: 131–140.
- 514 Pinsky ML, Worm B, Fogarty MJ, Sarmiento JL, Levin SA. Marine taxa track local climate  
515 velocities. *Science*, 2013; 341(6151): 1239-1242.
- 516 Sanz-Elorza M, Dana ED, Gonzalez A, Sobrino E. Changes in the high-mountain vegetation of  
517 the central Iberian Peninsula as a probable sign of global warming. *Ann. Bot. (Lond)*.,  
518 2003; 92: 273–280.
- 519 Stephens PA, Sutherland WJ, Freckleton RP. What is the Allee effect? *Oikos*, 1999; 87(1):185-  
520 190.
- 521 Sturm M, Racine C, Tape K. Climate change: increasing shrub abundance in the arctic. *Nature*,  
522 2001; 411, 546–547.
- 523 Thomas CD. Climate, climate change and range boundaries. *Diversity and Distributions*, 2010;  
524 16: 488-495.
- 525 Travis MJJ, Münkemüller T, Burton OJ, Best A, Dytham C, Johst K. Deleterious mutations can  
526 surf to high densities on the wave front of an expanding population. *Molecular Biology and*  
527 *Evolution*, 2007; 24(10): 2334-2343.
- 528 Tyler MJ (1989) *Australian Frogs: A Natural History*. Ithaca, NY: Cornell University Press
- 529 Urban MC, Phillips BL, Skelly DK, Shine R. The cane toad's (*Chaunus marinus*) increasing  
530 ability to invade Australia is revealed by a dynamically updated range model. *Proceedings*  
531 *of the Royal Society of London, Series B: Biological Sciences*, 2007; 274(1616): 14131419.



- 532 Vucetich JA, Waite TA. Spatial patterns of demography and genetic processes across the  
533 species' range: Null hypotheses for landscape conservation genetics. *Conservation*  
534 *Genetics*, 2003; 4(5): 639-645.
- 535 Wallace B. Hard and soft selection revisited. *Evolution*, 1975; 29: 465-473.
- 536 Walther GR, Post E, Convey P, Menzel A, Parmesan C, Beebee TJC, Fromentin J-M, Hoegh-  
537 Guldberg O, Bairlein F. Ecological responses to recent climate change. *Nature*, 2002; 416,  
538 389–395
- 539 Walther GR. Plants in a warmer world. *Perspect. Plant. Ecol.*, 2003; 6, 169–185.
- 540 Willi Y, Fracassetti M, Zoller S, Van Buskirk J. Accumulation of mutational load at the edges of  
541 a species range. *Molecular Biology and Evolution*, 2018; doi:10.1093/molbev/msy003.
- 542 Wolf C, Ripple WJ. Range contractions of the world's large carnivores. *Royal Society Open*  
543 *Science*, 2017; 4(7), 170052. <http://doi.org/10.1098/rsos.170052>.

## 544 Figure Captions

545 **Fig 1. Fitness loss per time and space under soft selection.** Trajectories of mean fitness loss  
546 over time and space at the expanding front under soft selection show more overall fitness loss for  
547 range shifts. Vertical lines indicate when the population reaches the end of the 1x300 deme  
548 landscape and expansion is complete. Shaded regions show two standard errors calculated over  
549 ten replicate simulations. The fastest shift ( $v = 0.2$ ) expands at a speed closest to the full  
550 expansion, and is compared to two slower speed shifts ( $v = 0.05, 0.02$ ). At  $v = 0.02$ , the  
551 population has not crossed the landscape over the time course of the simulation – the end of  
552 these lines in C and D are only indicative of this, and not extinction. Analytic solutions for  
553 fitness loss over time are shown as dotted lines in panels A and B, where evolution of mean  
554 fitness is given by eq. (1) with  $F = K m / 2$ , where  $K$  is the (diploid) carrying capacity of a deme.

555 The accumulation of fixed deleterious and fixed beneficial mutations for these cases can be seen  
556 in Supplemental Fig S1.

557 **Fig 2. Decomposing fitness loss per time and space.** Fitness loss measured per unit time  
558 (generations, A) and per unit distance travelled (demes, B). The non-monotonic pattern of fitness  
559 loss per distance in B is explained by the combination of mutations entering the population (C)  
560 and fixation probability (D) for a given speed of a range shift. Dashed lines indicate beneficial  
561 alleles while solid red lines indicate deleterious alleles. The product of fixation probability with  
562 number of available mutations produces the fitness change per deme shown in B in solid black.  
563 Simulations across speeds are shown in blue, where rates of fitness loss for simulations are  
564 calculated within the first 2,000 generations, before beneficial mutations begin to saturate and  
565 after generation 100 to ignore initial effects of expansion.

566 **Fig 3. Fitness loss per time and space under hard selection.** Trajectories of mean fitness loss  
567 over time and space at the expanding front under hard selection during and after range  
568 expansions and range shifts. The vertical line in the top left panel indicates when the expansion  
569 has reached the end of the 1x300 deme landscape and expansion is complete. This is the only  
570 case that finished crossing the landscape during the 5,000 generation time course of simulation,  
571 with other cases going extinct or taking more time to spread. Shaded regions show two standard  
572 errors calculated over ten replicate simulations.

573 **Fig 4. Fitness change over varying mutational assumptions.** The assumption of fixed  
574 selection coefficients,  $s$ , and fixed dominance parameters,  $h$ , are relaxed to compare qualitative  
575 outcomes of fitness loss during expansion and fitness recovery after expansion. Shaded regions  
576 show two standard errors calculated over ten replicate simulations and the vertical line indicates  
577 when the landscape has been crossed and expansion is complete. Our original mutational

578 parameters of fixed  $s$  and  $h = 0.5$  (fully additive) or  $h = 0.0$  (fully recessive) are shown in black  
579 and gray solid lines, respectively. Colored solid, dashed, and dotted lines show comparison cases  
580 of  $h = 0.3$  with either constant or exponentially distributed  $s$  values, or an  $h$ - $s$  trade-off along  
581 with an exponential DFE across scenarios of range expansion (A) and our fastest (B) and a  
582 slower (C) range shift scenario.

## 583 Supporting Information

584 **S1 Table. Fitness loss and mutation accumulation across scenarios.** Absolute fitness loss and  
585 mutation fixations during expansion per 1-D simulation scenario, averaged over 10 replicate  
586 simulations. Cases indicated with a \* go extinct before the expansion completes.  $T$  indicates the  
587 number of generations between which the population moves over the landscape and  $v$  is the  
588 speed of spread (inverse of  $T$ , as defined in the Methods).

589 **S2 Table. Simulation parameters.** All parameter combinations simulated in the current study to  
590 ensure reproducibility of the results. Software code can be downloaded from  
591 <https://github.com/kjgilbert/ExpLoad>. Parameters written in italics within parentheses are the  
592 exact software input names used by the simulation. 10 replicate simulations were run with data  
593 saved every 100 generations.

594 **S1 Fig. Mutation fixation through time.** Fixation of deleterious (A, C, E, G) and beneficial (B,  
595 D, F, H) mutations at the expanding range front, under soft and hard selection on a 1-  
596 dimensional landscape. Vertical lines indicate when the landscape has been crossed and  
597 expansion is complete; extinction has occurred for lines that end abruptly. Shaded area indicates  
598 two standard errors over 10 replicates.

599 **S2 Fig. Fitness change through time and space across parameter ranges.** The trade-off  
600 between mutations entering the population and selection acting upon these mutations combines

601 to create the non-monotonic pattern of fitness loss seen across speeds of range shifts, as shown  
602 by our analytic model. The parameter set in the main text is seen in panels B, E, and H, where  
603 carrying capacity,  $K = 100$  and migration rate,  $m = 0.1$ . The impact of beneficial mutations on  
604 fitness always decreases with faster speeds due to increasingly inefficient selection (A-C).  
605 Deleterious mutations impact fitness non-monotonically across speeds (A-C) because even  
606 though more mutations enter the system at slower speeds (more generations pass), selection is  
607 more efficient at removing them at slower speeds. Meanwhile at the fastest speeds drift is  
608 strongest, but fewer mutations are present (fewer generations for mutational input). D-F show the  
609 combined impact of deleterious and beneficial mutations on fitness from A-C. With higher  $K$  and  
610 higher  $m$ , or extremely low  $m$ , the non-monotonic pattern of fitness loss per distance travelled is  
611 lost. Fitness loss per time (H-I) is always worse at faster speeds.

612 **S3 Fig. Extinction due to reduced population growth.** As fitness decreases at the front of a  
613 range shift due to expansion load (dashed lines), population growth decreases leading to  
614 increasingly small population sizes at the expanding front of range shifts (solid lines), under hard  
615 selection and with additive mutations. When fitness and thus population size reach a sufficiently  
616 low level, the population is no longer able to replace itself as fast as the pace of the shifting  
617 environment, resulting in extinction. This occurs more quickly with faster speeds of range shift,  
618 since fitness is lost faster through time and populations have less time to recover in size after  
619 colonizing new habitat. These analytic approximations qualitatively match our simulations  
620 (Figure 3A).

621 **S4 Fig. Neutral genetic diversity through time.** Neutral diversity over 1000 neutral loci during  
622 and after range expansion and shifts at both the expanding edge and in the core (which is  
623 calculated as the rear-most deme in range shifts, i.e. the receding edge). Shading indicates 95%

624 confidence intervals over 20 replicates (10 replicates under additive model for selected loci, 10  
625 replicates under recessive model for selected loci). Vertical lines in the left panel indicate when  
626 the landscape is crossed and expansion is complete. Slower shifts do not cross the landscape  
627 within 5,000 generations. Four various speeds of range shifts are compared.

628 **S5 Fig. Soft selection 2-dimensional range expansions and shifts.** Range expansions and shifts  
629 ( $v = 0.2$ ) in two dimensions are compared for cases where either the population size across the 5-  
630 deme-wide front is equivalent to population size in the 1-deme-wide front (2D  $K = 20$  vs. 1D  $K$   
631  $= 100$  and 2D  $K = 100$  vs. 1D  $K = 500$ ), or alternatively where the per-deme carrying capacity,  $K$ ,  
632 is held constant across comparisons (2D  $K = 100$  vs. 1D  $K = 100$ ). Shaded regions show two  
633 standard errors calculated over ten replicate simulations. Vertical lines indicate when the  
634 landscape has been crossed and expansion is complete

635 **S6 Fig. Hard selection 2-dimensional range expansions and shifts.** Results for fitness change  
636 of 2-D versus 1-D simulations under hard selection. Shaded regions indicate two standard errors  
637 over 10 replicates. Vertical lines indicate when the landscape has been crossed and expansion is  
638 complete. Absence of a line indicates extinction.

639 **S7 Fig. Recovery due to beneficial mutations.** Ridgeline plots of allele frequency change  
640 through time across the exponential distribution of fitness effect sizes, described in the Methods.  
641 Locus allele frequencies have been binned into equal-sized bins of 10 loci each, across the 900  
642 deleterious and 100 beneficial loci, making each line represent 100 bins across the range of the  
643 selection coefficient,  $s$ , rather than 1000 loci. Each individual line across the  $y$ -axis is a sampled  
644 time point, with the start of the simulation being the top- (or back-) most line. Allele frequencies  
645 range from 0 to 1 on the  $z$ -axis.

646 **S8 Fig. Mutation fixation under various mutation models.** Deleterious (A) and beneficial (B)  
647 mutation fixation at the range edge across range expansions and range shifts, over varying  
648 mutational models of  $h$  and  $s$  as indicated in the figure legend.

649 **S9 Fig.  $h$ - $s$  tradeoff.** The  $h$ - $s$  relationship modelled for deleterious mutations under the  $h$ - $s$  trade-  
650 off scenarios shown in Results Figure 4. (see Methods for description)

651 **S10 Fig. Equilibrium expansion speeds.** Results under simulations with hard selection for  
652 sufficiently slow speeds of range shift show that fitness is on average neither gained or lost at the  
653 expanding front, until mutations begin to saturate between generations 2,000 - 3,000. Under an  
654 additive mutation model, this speed is realized at 0.017 demes per generation ( $v = 1/60$ ) and  
655 under a recessive model at 0.012 demes per generation ( $v = 1/84$ ).

# Additive, $h = 0.5$

# Recessive, $h = 0.0$

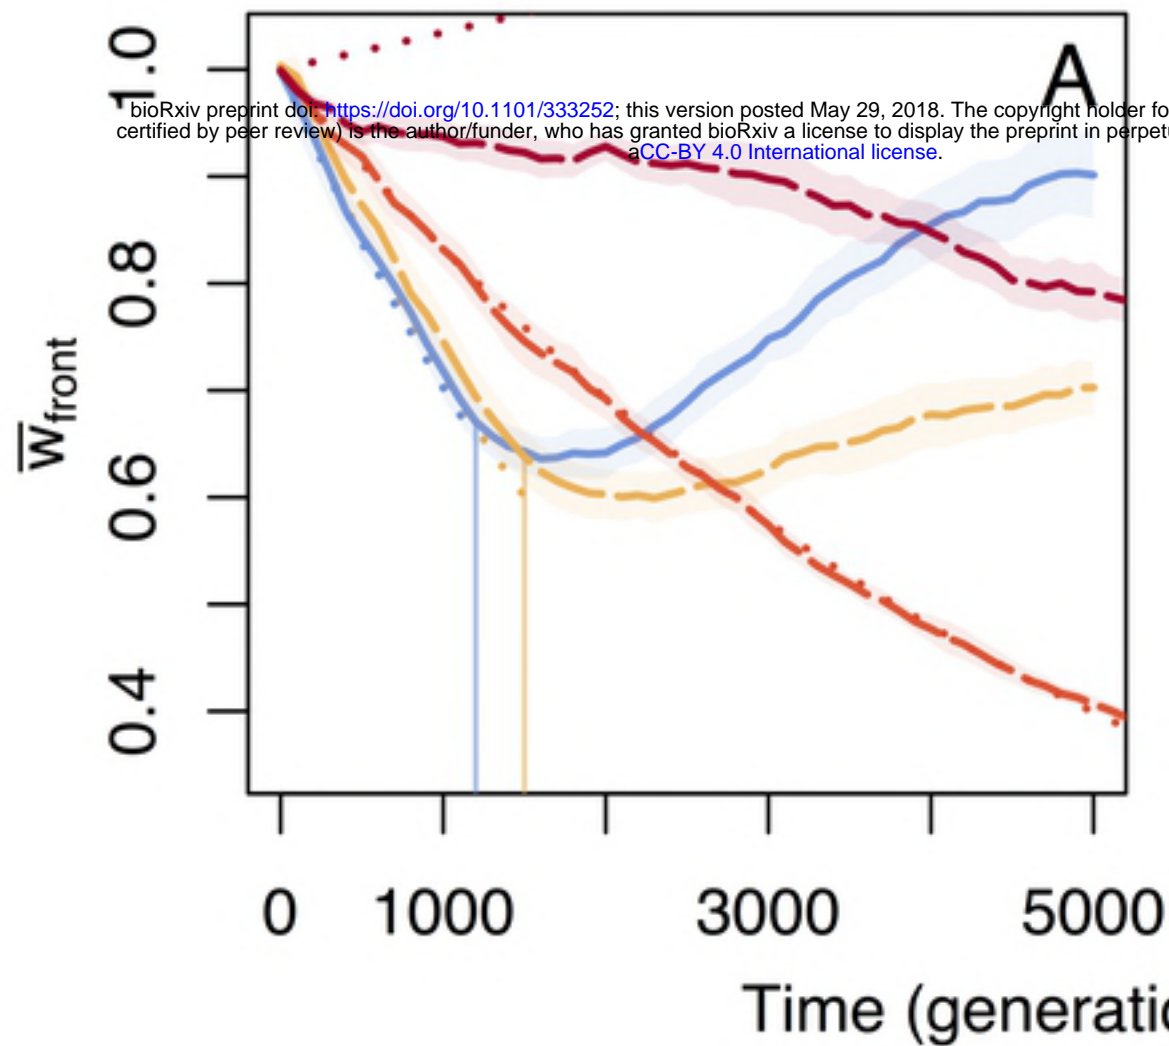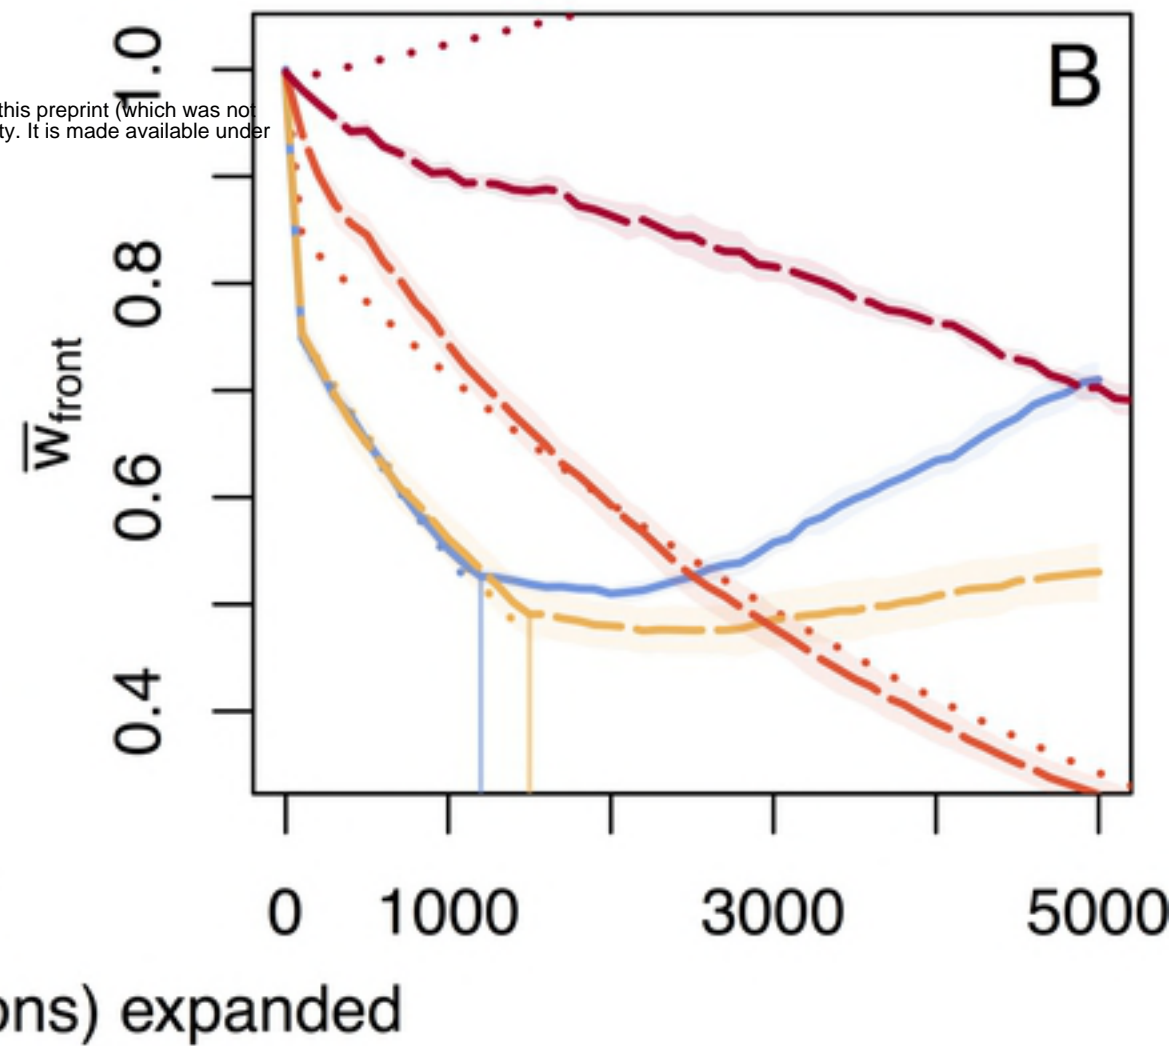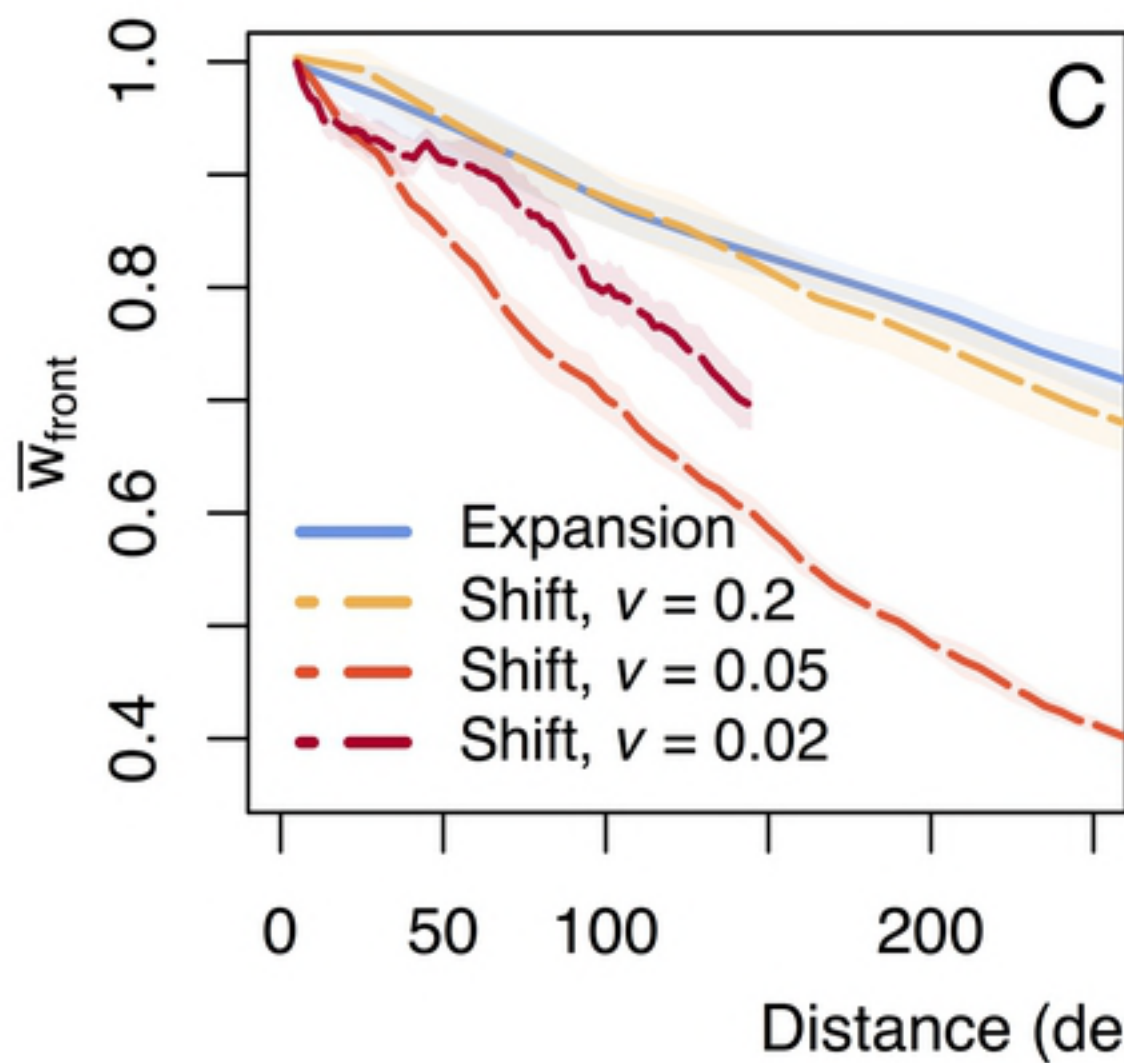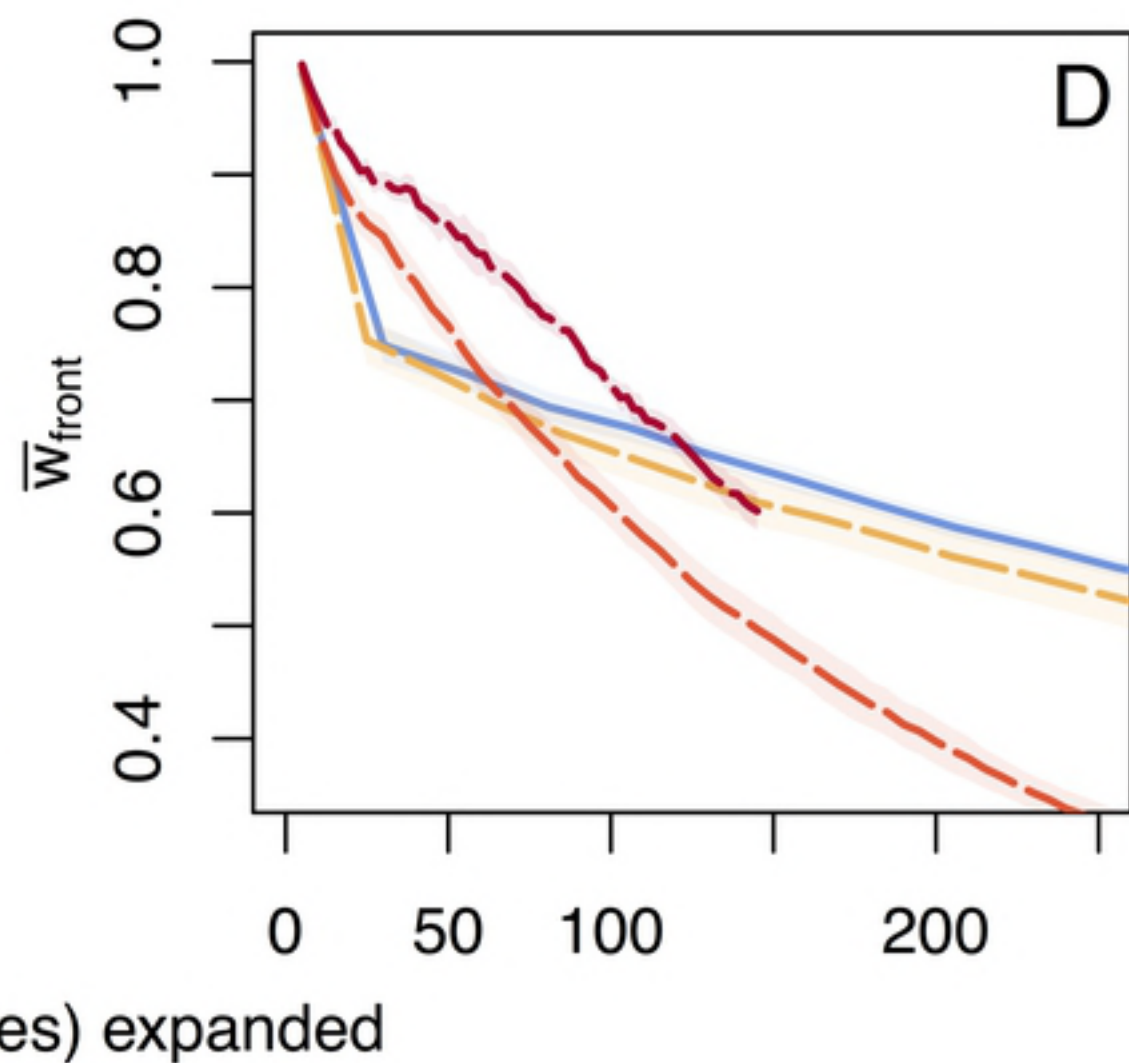

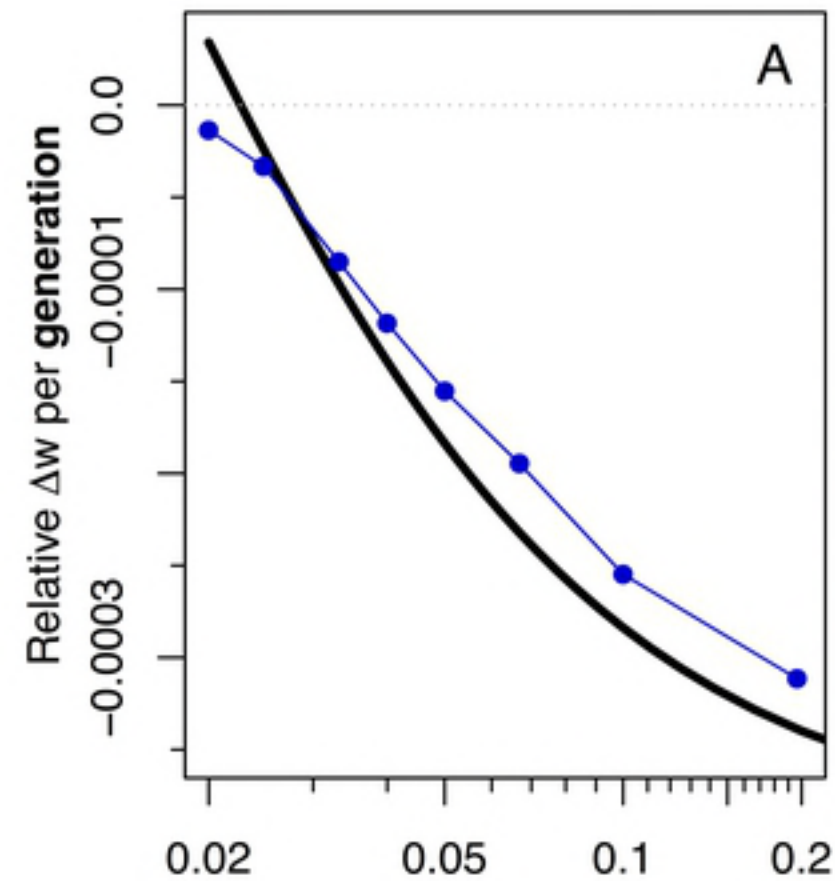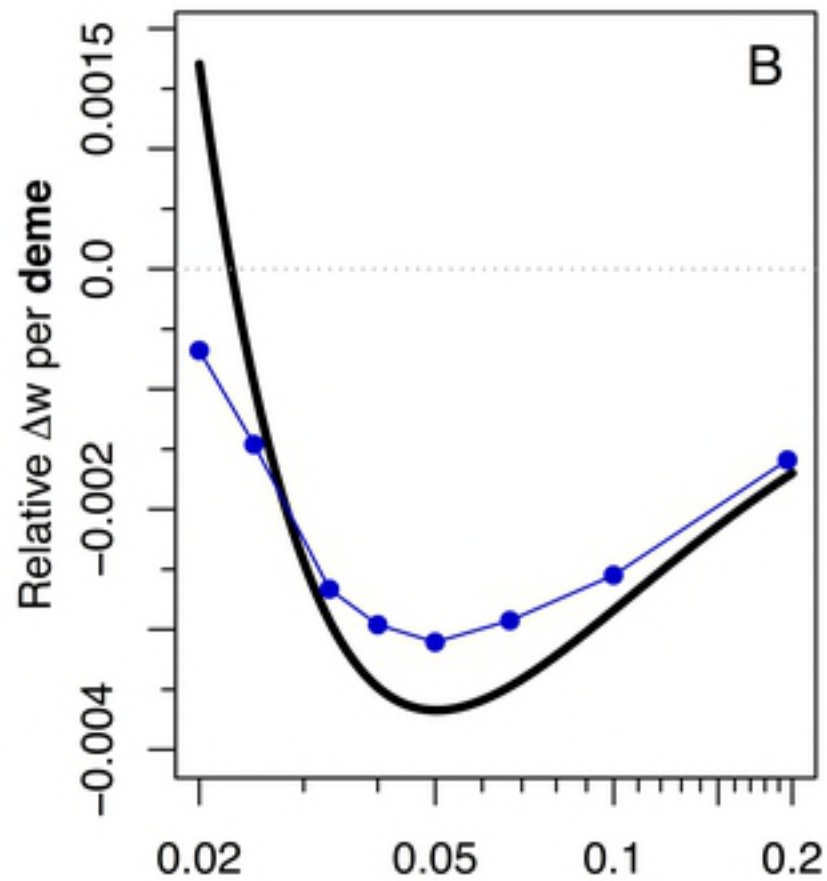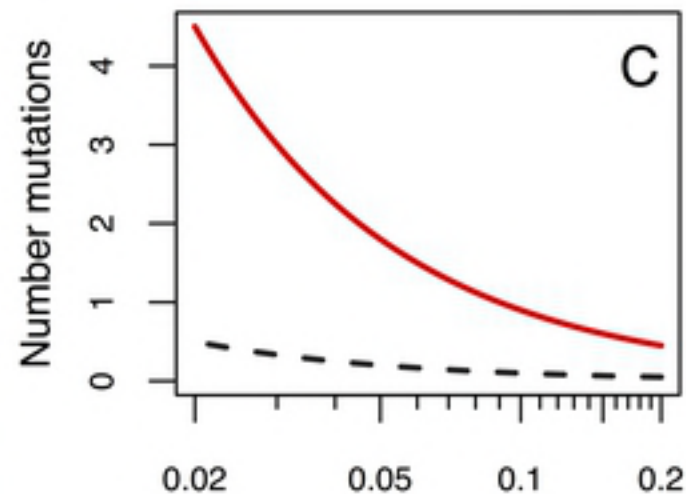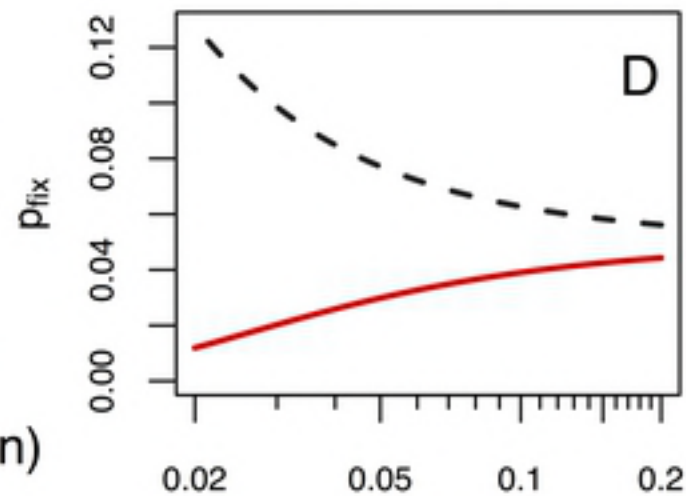

- - Beneficial mutations      - - Analytic  $\Delta \bar{w}$   
 - Deleterious mutations      -•- Simulation  $\Delta \bar{w}$

Shift speed (demes per generation)



# Additive, $h = 0.5$

# Recessive, $h = 0.0$

bioRxiv preprint doi: <https://doi.org/10.1101/333252>; this version posted May 29, 2018. The copyright holder for this preprint (which was not certified by peer review) is the author/funder, who has granted bioRxiv a license to display the preprint in perpetuity. It is made available under aCC-BY 4.0 International license.

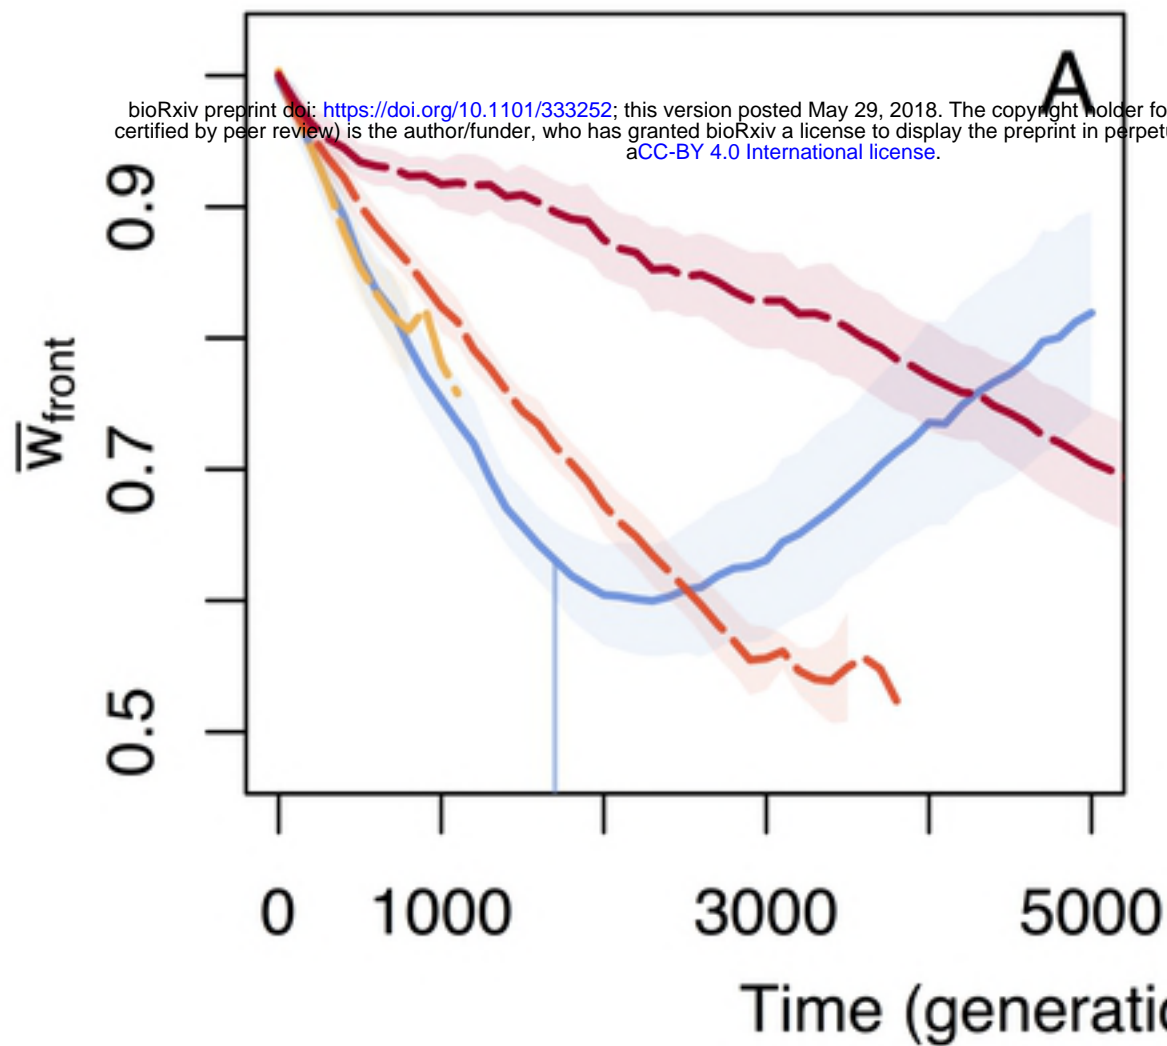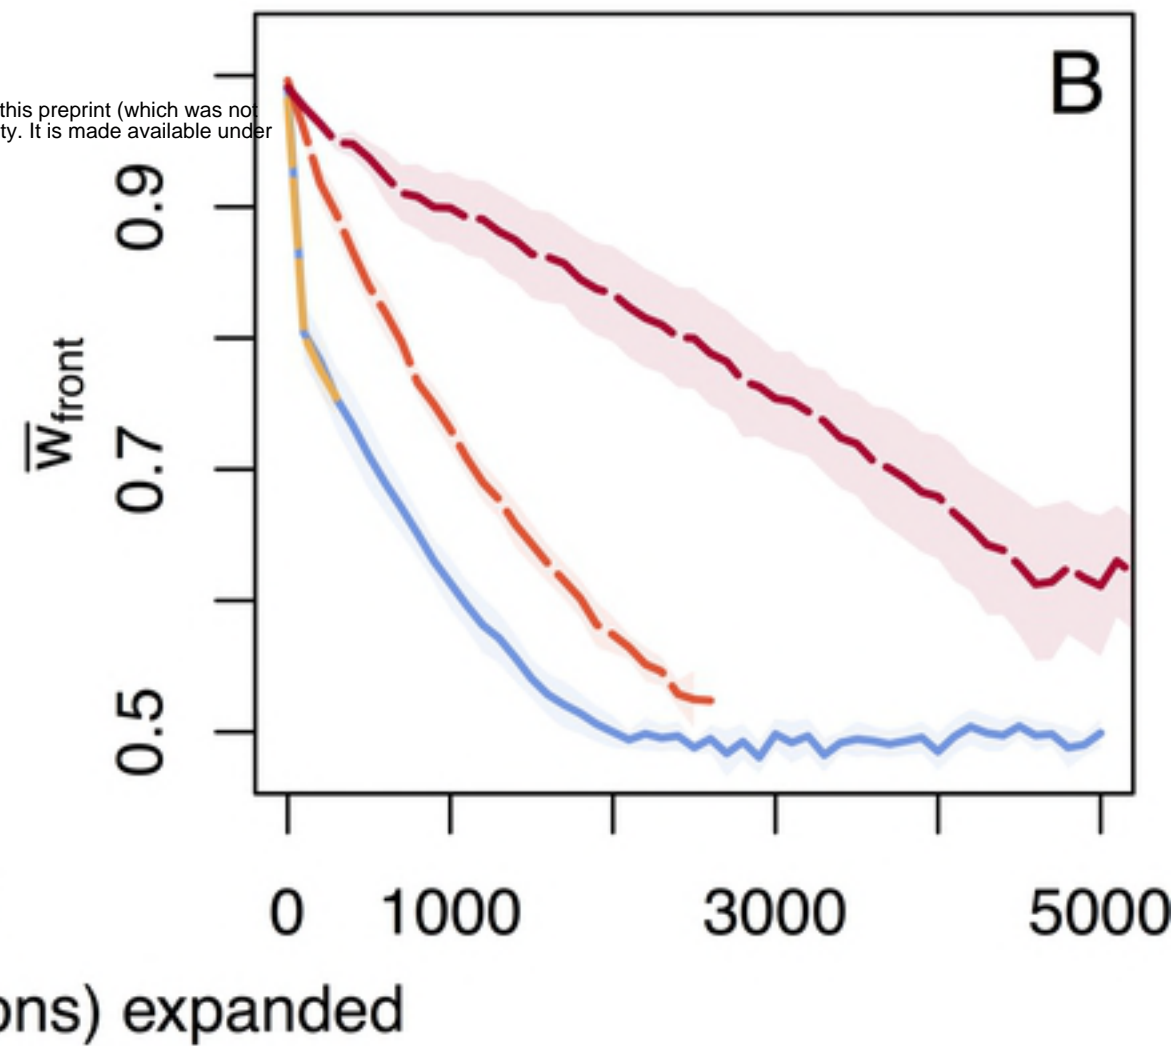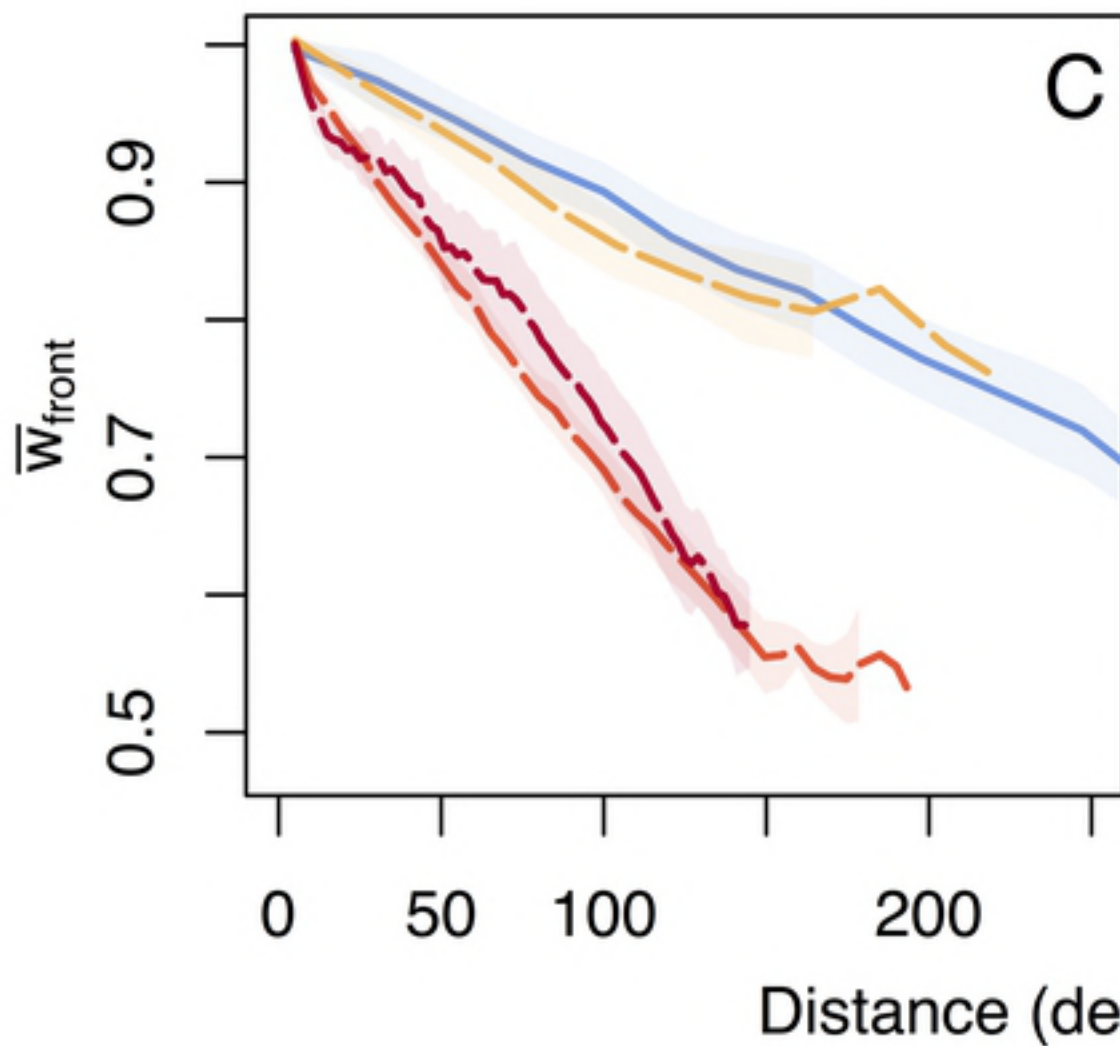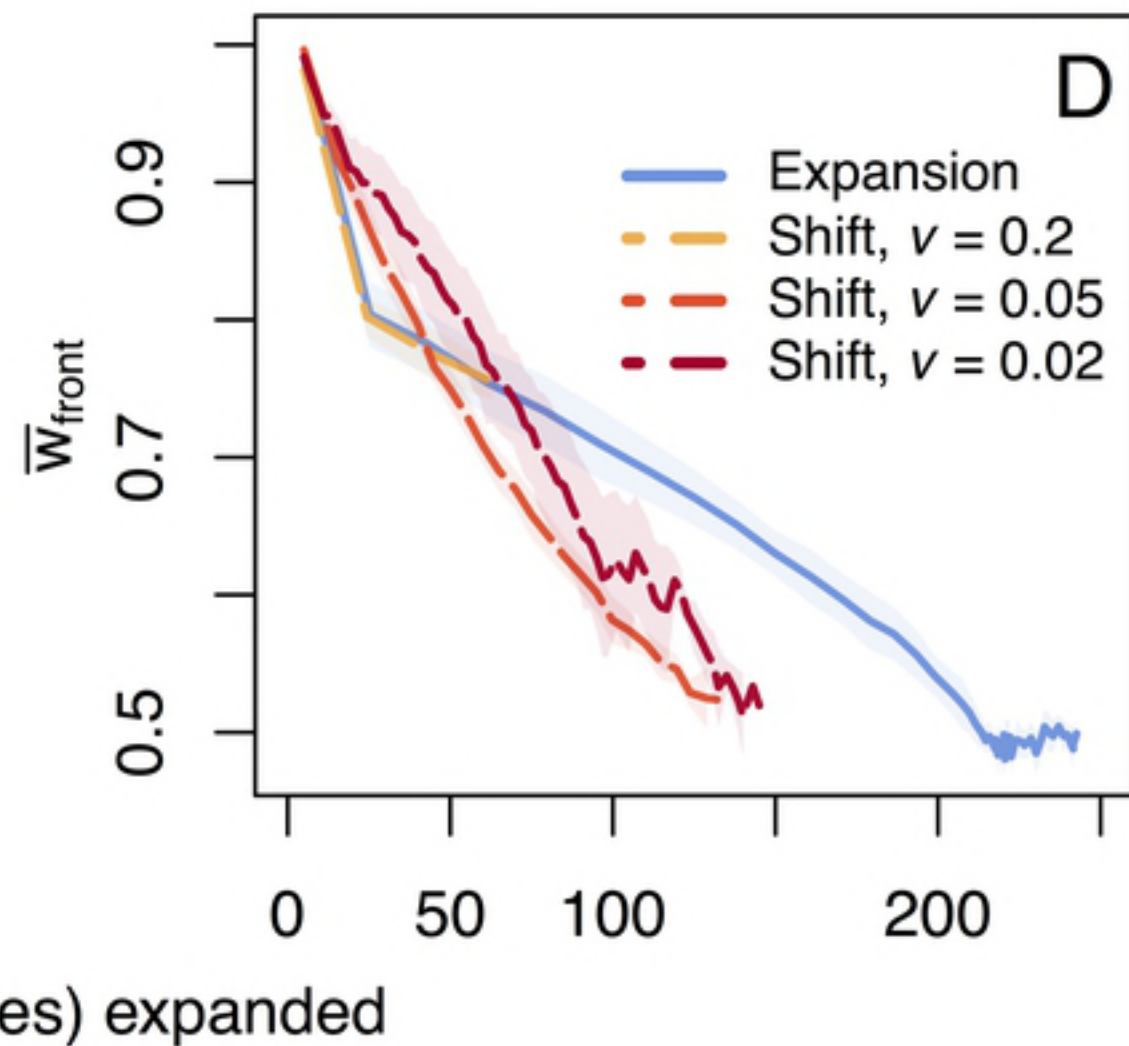

Expansion

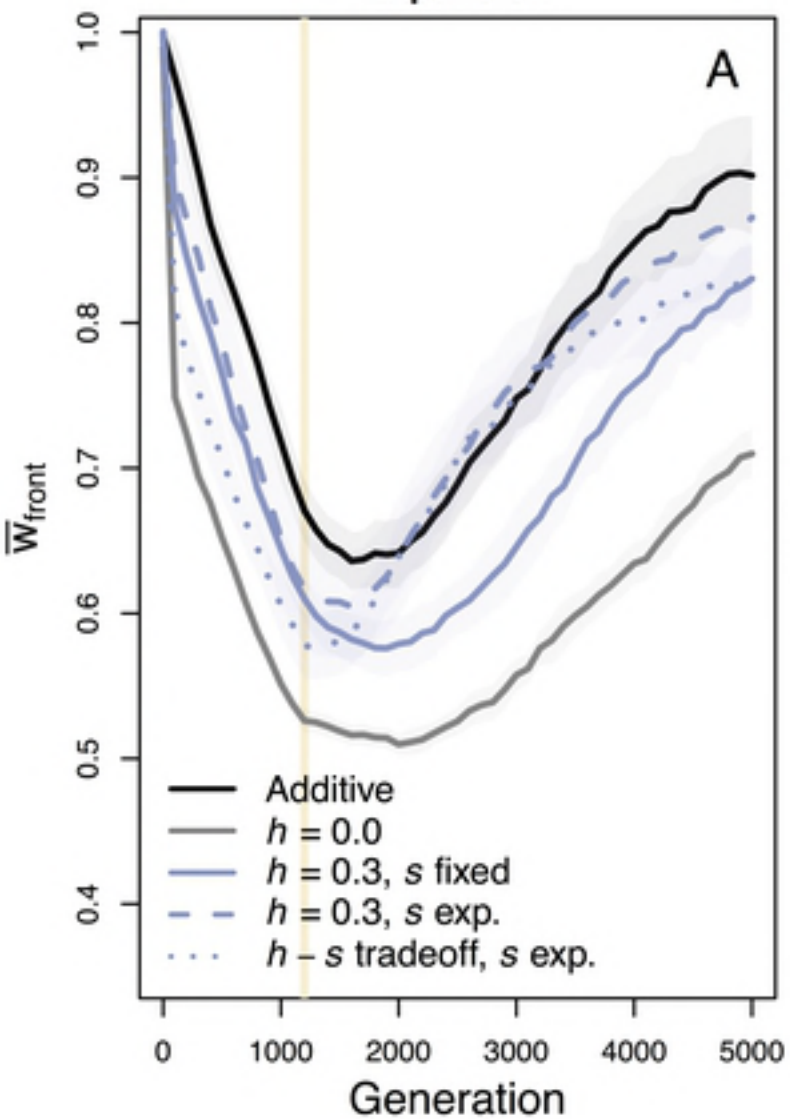

Shift - speed = 0.2

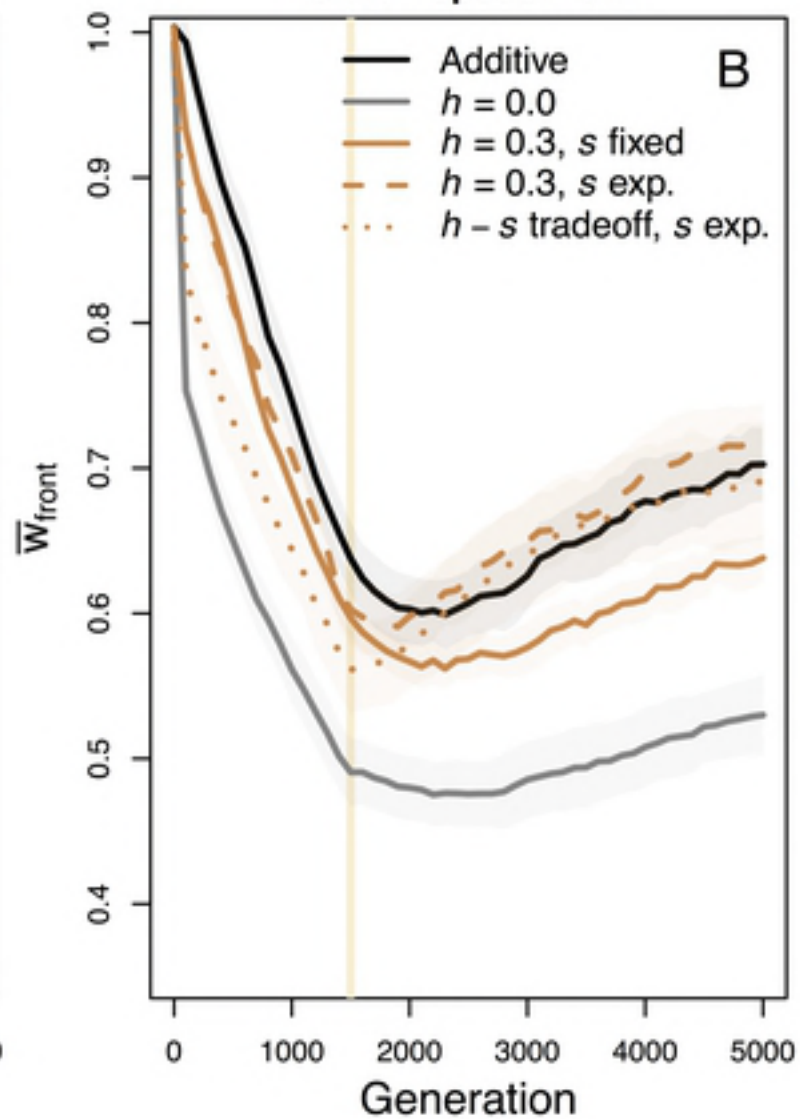

Shift - speed = 0.1

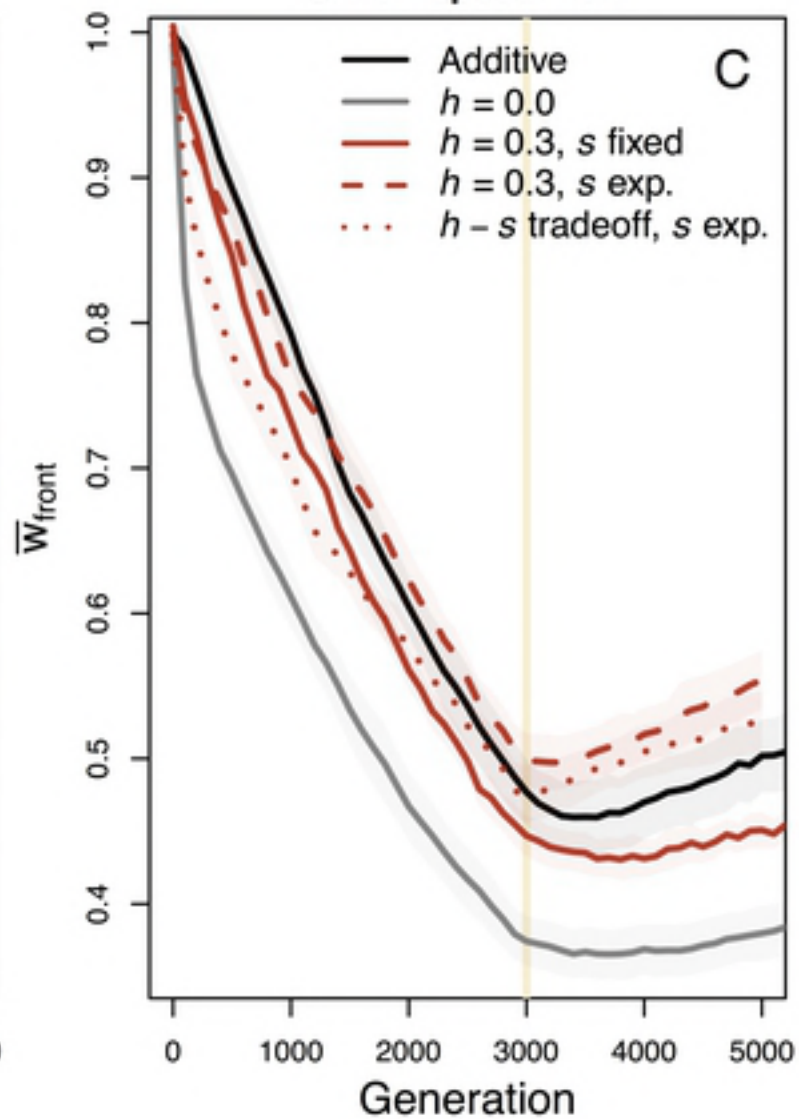

Source: http://biorxiv.org/content/10.1101/333252v1.full.pdf
